# Supplementary material for: Dual-independent active sites for efficient hydrogen production
Source: Royal Society of Chemistry journal article supplement (doi:10.1039/d4ta03506b), 2024-01-01
Supplement: d4ta03506b1.pdf [file d4ta03506b1.pdf]

## Dual-Independent Active Sites for Efficient Hydrogen Production

*Yangyang Feng<sup>a†\*</sup>, Yongxin Guan<sup>b†\*</sup>, Lei Wen<sup>b</sup>, Yunxia Liu<sup>b</sup>*

<sup>a</sup>CAS Key Laboratory of Design and Assembly of Functional Nanostructures, and Fujian Provincial Key Laboratory of Nanomaterials, State Key Laboratory of Structural Chemistry, Fujian Institute of Research on the Structure of Matter, Chinese Academy of Sciences, Fuzhou 350002, Fujian, P. R. China.

<sup>b</sup>Key Laboratory of Material Processing and Mold Technology, School of Architectural Engineering, Chongqing Industry Polytechnic College, Chongqing 401120, China.

<sup>†</sup>These authors contributed equally to this work

\* Corresponding author

### Materials and methods

#### Materials:

Cobalt nitrate ( $\text{Co}(\text{NO}_3)_2$ , Aldrich, 99.9%), Sodium molybdate ( $\text{Na}_2\text{MoO}_4$ , Aldrich, 99.9%), Glucose (Alfa), Sodium Carbonate ( $\text{Na}_2\text{CO}_3$ , Aldrich, 99.9%), Ammonia Hydroxide ( $\text{NH}_3 \cdot \text{H}_2\text{O}$ , Aldrich, 28-30 wt%), Molybdenum carbide ( $\text{Mo}_2\text{C}$ , 99%) .

#### Sample preparation

Preparation of  $\text{Mo}_2\text{C}@C/\text{Co}@C$ :

The preparation of MoCo hydroxide precursor: 2.5 mmol  $\text{Na}_2\text{MoO}_4$  and 2.5 mmol  $\text{Co}(\text{NO}_3)_2$  were gradually put into 40 mL D.I. water with strong stirring. Then the solution was continued to stir for 15 min. After stirring, the mixture was poured into the 50 mL autoclave and transferred into an oven at 150 °C for 6 h. After reaction, the sample was precipitated at the bottle of the autoclave and then washed several times by

D.I. water and ethanol to remove the impurities. Finally, the precursor was dried in a vacuum oven for 12 h.

The polymerized glucose coating: the precursor (100 mg) and glucose (0.5 mM) were mixed in deionized water (40 mL). The solution after uniform mixing was transferred into autoclave for carbon coating (180 °C, 8 h). Then, cleaning and washing the as-obtained intermediate products by D.I. water and ethanol, and drying overnight at 60 °C.

The preparation of Mo<sub>2</sub>C@C/Co@C: the polymerized glucose-coated sample was put into tube furnace under calcination in Ar to form Mo<sub>2</sub>C@C/Co@C under 700 °C for 200 min.

Preparation of Co NPs: The 12.5 mL NH<sub>3</sub>·H<sub>2</sub>O (28 wt%), 12.5 mL ethylene glycol, 5 mL 1 M Co (NO<sub>3</sub>)<sub>2</sub> aqueous solution and 5 mL 1 M Na<sub>2</sub>CO<sub>3</sub> aqueous solution were mixed together. After strong stirring for about 10 min, the mixture was transferred into the autoclave with a volume of 50 mL and calcinated at 170°C for 16 h in the oven. After washing and drying, the precursor was put into tube furnace under Ar/H<sub>2</sub> at 700 °C for 200 min.

### **Characterization**

The morphology characterizations were investigated by scanning electron microscope (SEM, FEI, JSM-7800F) under the voltage of 5 kV, energy dispersive spectrometer analyzer (EDS), and transmission electron microscope (TEM, Tecnai, 300 kV). The phase and structure characterizations are tested by X-ray diffractometer (XRD, Bruker

ECO D8 power) under Cu Ka with the 2 theta of 10-90°, X-ray photo electron spectrometer (XPS, ESCALAB 250Xi, Thermo scientific, 225 W, 15 mA, 15 kV Al K $\alpha$ ), Raman microscope (Renishaw Invia, laser: 532 nm) and BET specific-surface-area pore-size analyzer (Quantachrome Autosorb-6B).

### **Electrochemical Measurements:**

Electrochemical properties were conducted on CHI660 workstation by a three-electrode setup, which includes carbon rod, reference electrode and catalyst. The saturated calomel electrode (SCE) was used as a reference electrode in 1.0 M KOH with various hydrazine. Linear sweep voltammetry (LSV) was performed at the scan rates of 5 mV/s from -1.7 to -1.0 V and -1.2 to -0.8 V for HER and HzOR, respectively. The Tafel slope was obtained by fitting the linear portion of the Tafel plots to the Tafel equation of  $[\eta = b \log(j)+a]$ . The electrochemical active surface areas (ECSAs) were estimated in 1.0 M KOH by calculating the double-layer capacitances ( $C_{dl}$ ) at the solid-liquid interface from cyclic voltammograms (CVs) method at the scan rates of 10-120 mV/s. ECSA in this work was calculated by electrochemical double layer capacitance ( $C_{dl}$ ) values via the following equation:

$$ECSA = \frac{C_{dl}}{C_s}$$

$C_s$  refers to the specific capacitance which is calculated through smooth planar surface. The specific capacitance on the smooth surface is accepted to be during 20 to 60  $\mu\text{F}/\text{cm}^2$ . In this manuscript, we assumed 40  $\mu\text{F}/\text{cm}^2$ .

In all measurements, the reference electrode was calibrated with respect to the reversible hydrogen electrode (RHE).

OH<sub>2</sub>S electrolyzer: OH<sub>2</sub>S test was conducted in 1 M KOH/0.2 M N<sub>2</sub>H<sub>4</sub> with Mo<sub>2</sub>C@C/Co@C as anode and cathode.

Zn-H<sub>2</sub> battery with Mo<sub>2</sub>C@C/Co@C cathode: The aqueous rechargeable Zn-H<sub>2</sub> battery test was conducted in a double-electrolyte system separated by anion-exchange membrane. The cathodic compartment was filled with 1 M KOH with 0.2 M N<sub>2</sub>H<sub>4</sub> and the anodic electrolyte was 1 M KOH and 0.02 M Zn(CH<sub>3</sub>COO)<sub>2</sub>. A Zn plate after mechanical polishing with sandpaper with an area of 2×5 cm<sup>2</sup> was applied as the anode and carbon paper (0.5×0.5 cm) with catalyst as cathode.

### **Theoretical calculations**

Calculations in this work were performed using the CASTEP code by Vienna ab Initio Simulation package (VASP). The interaction between core and valence electrons is presented by standard PAW potentials. The correlation functional and electron-electron exchange were described via Perdew-Burke-Ernzerhof generalized gradient approximation (PBE-GGA). The electron wave function was in plane-wave with the cutoff energy of 450 eV in all computations with the force threshold of 0.01 eV/Å.

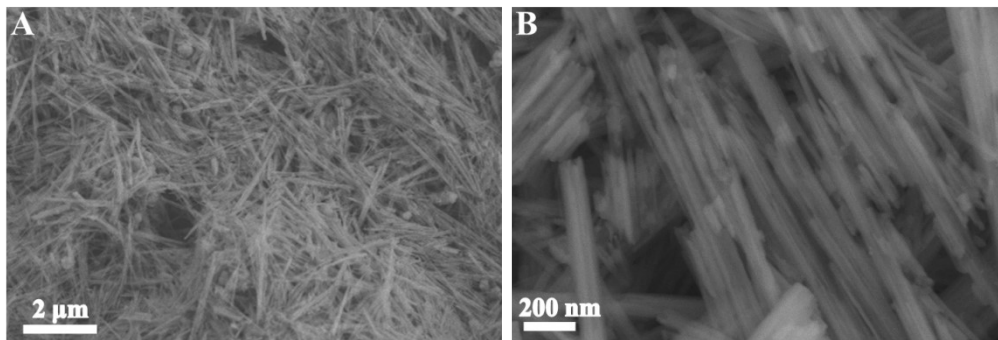

**Figure S1.** SEM images of rod-like MoCo hydroxide in different resolutions.

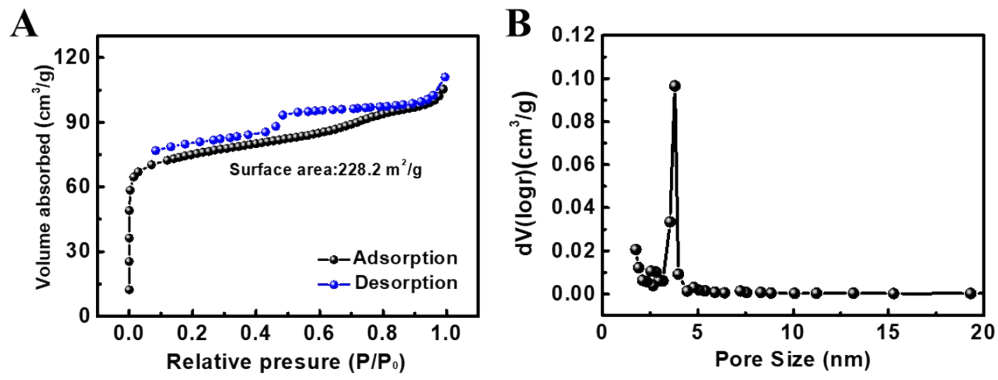

**Figure S2.** A) BET profile of Mo<sub>2</sub>C@C/Co@C to reveal the specific surface area and B) pore size distribution derived from the desorption branch.

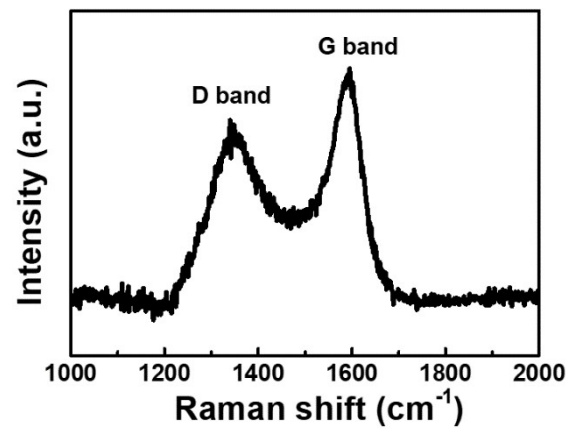

**Figure S3.** Raman spectrum of Mo<sub>2</sub>C@C/Co@C.

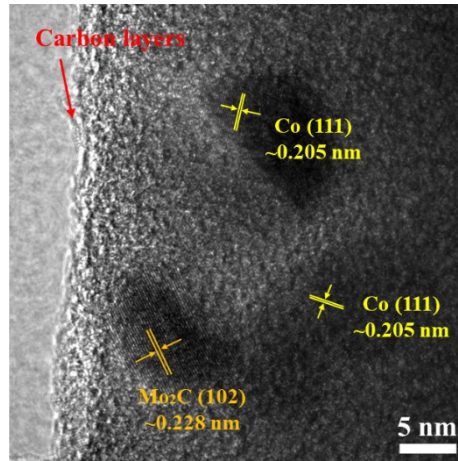

**Figure S4.** HRTEM image of Mo<sub>2</sub>C@C/Co@C.



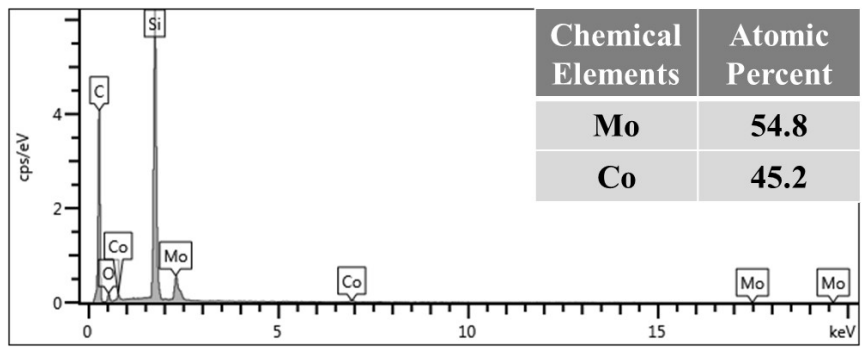

**Figure S5.** The corresponding EDS of Mo<sub>2</sub>C@C/Co@C.

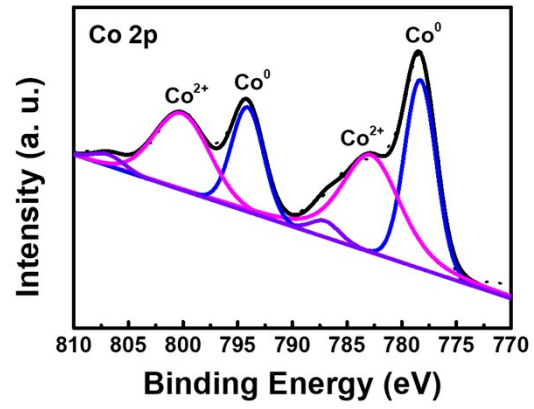

**Figure S6.** The XPS spectrum of Co 2p in Mo<sub>2</sub>C@C/Co@C.

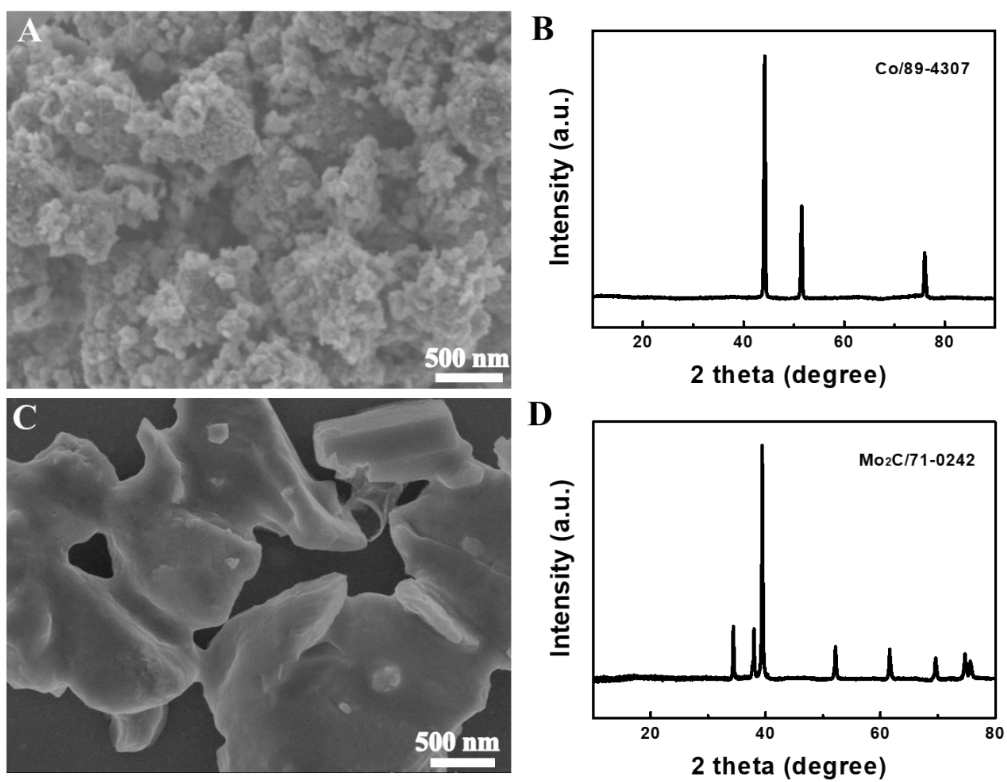

**Figure S7.** A), C) SEM image and B), D) XRD pattern of A-B) Co NPs and C-D)

Mo<sub>2</sub>C.

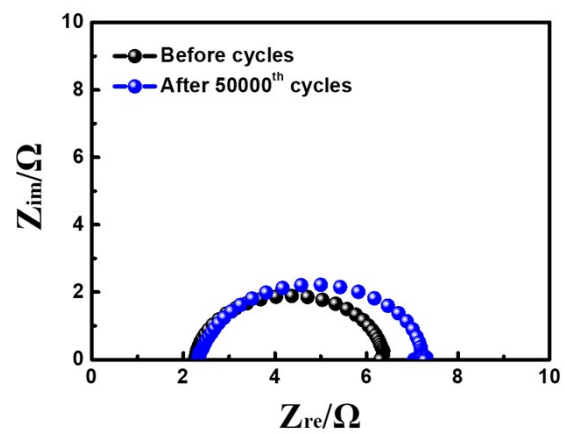

**Figure S8.** The EIS curves before and after 50000<sup>th</sup> CV sweeps of HER at 100 mV/s.

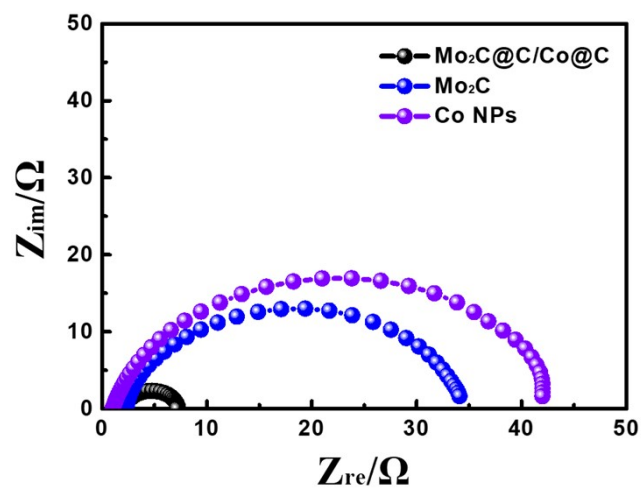

**Figure S9.** Nyquist plots of Mo<sub>2</sub>C@C/Co@C, Mo<sub>2</sub>C and Co NPs tested at the same overpotential of 300 mV.

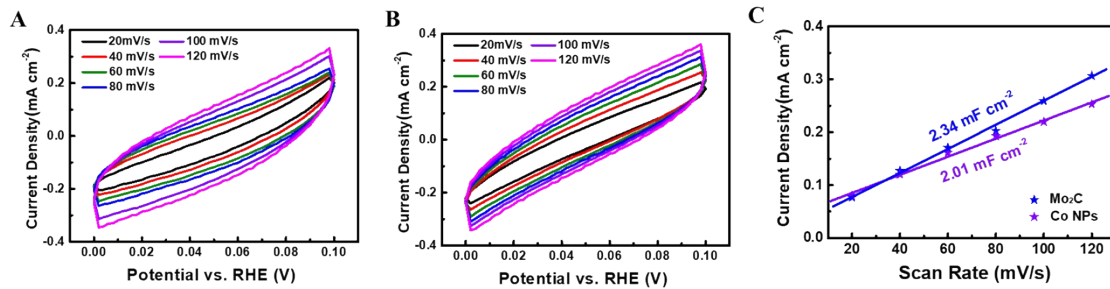

**Figure S10.** CV curves of (A) Mo<sub>2</sub>C and B) Co NPs tested at various scan rates from 20 to 120 mV s<sup>-1</sup> in the potential range of 0-0.1 V. (C) Scan rate dependence of the current densities of Mo<sub>2</sub>C and Co NPs.

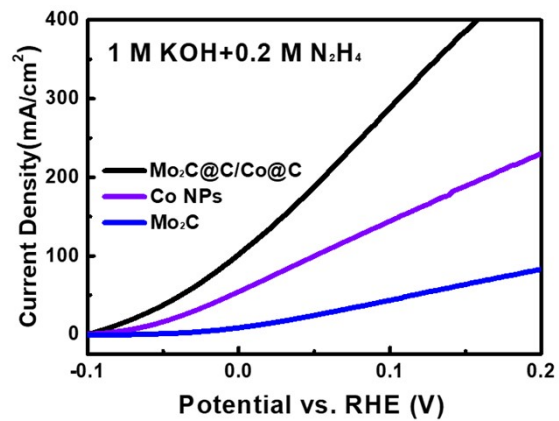

**Figure S11.** The comparing HzOR LSV curves tested in 1.0 M KOH with 0.2 M N<sub>2</sub>H<sub>4</sub>.

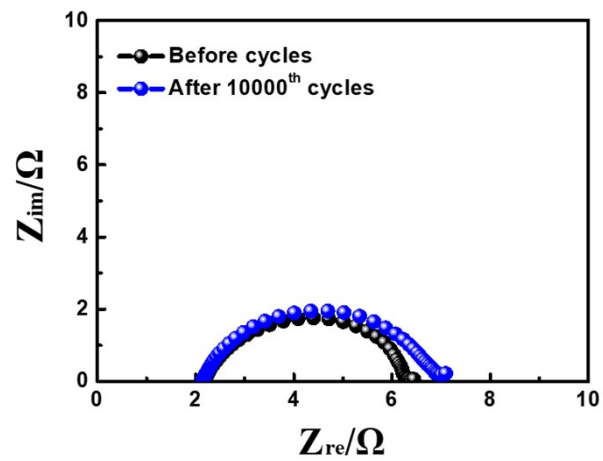

**Figure S12.** Nyquist plots of Mo<sub>2</sub>C@C/Co@C tested before and after 10000 cycles for HzOR.



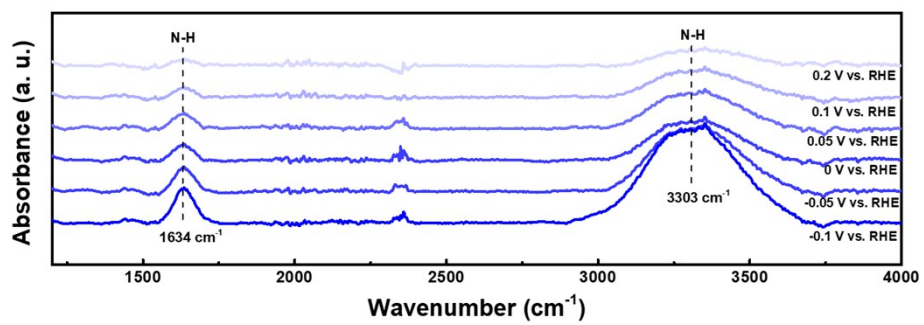

**Figure S13.** Potential-dependent in-situ FTIR spectra of  $\text{Mo}_2\text{C}@C/\text{Co}@C$  tested during the voltage of -0.1-0.2 V.

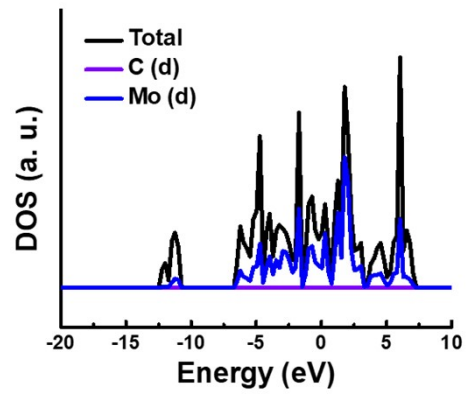

**Figure S14.** Total and partial density of states (DOS) calculated for Mo<sub>2</sub>C.

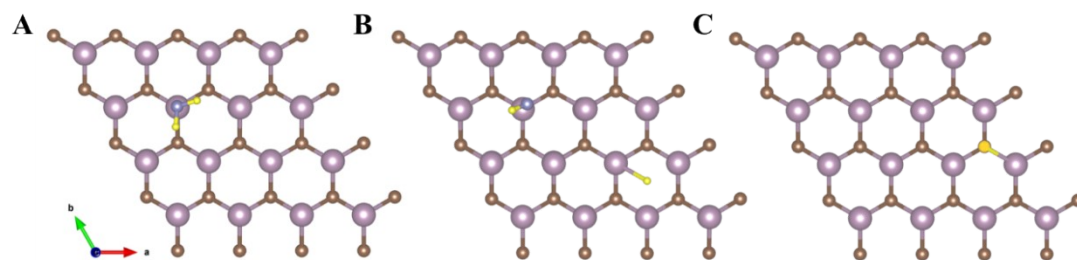

**Figure S15.** The water and hydrogen adsorption configurations of Mo<sub>2</sub>C at different directions.

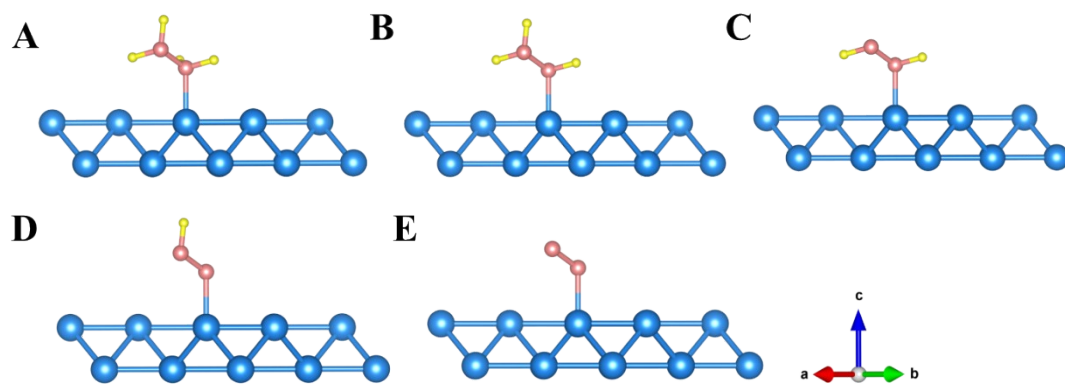

**Figure S16.** The atomic structure models of Co adsorbing  $N_2H_4$  at different steps in different directions.

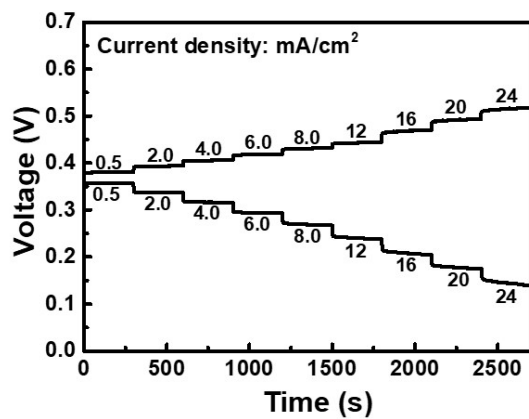

**Figure S17.** Galvanostatic discharge/charge curves at various current densities from 0.5 to 24 mA/cm<sup>2</sup>.

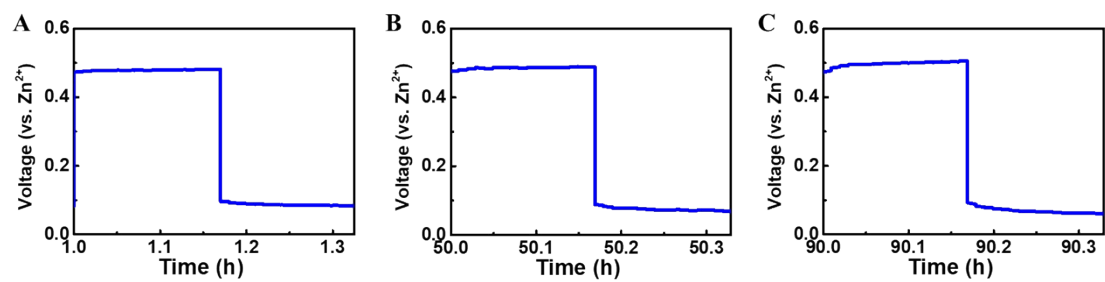

**Figure S18.** Partly enlarged galvanostatic discharge-charge cycling curves at 20 mA/cm<sup>2</sup>.

| Catalyst                                                               | $\eta_{10}$ (mV vs. RHE) | Tafel slope<br>(mV/dec) | Ref.                                              |
|------------------------------------------------------------------------|--------------------------|-------------------------|---------------------------------------------------|
| <b>Mo<sub>2</sub>C@C/Co@C</b>                                          | 71                       | 46.1                    | This work                                         |
| <b>Ni-Mo<sub>2</sub>C-CNF</b>                                          | 196                      | 54.7                    | J. Colloid Interface<br>Sci., 2020, 558, 100      |
| <b><math>\beta</math>-Mo<sub>2</sub>C Nanobelts</b>                    | 110                      | 49.7                    | Appl. Catal. B-<br>Environ., 2018, 224,<br>533    |
| <b>Ni-Mo<sub>2</sub>C/NC@NF</b>                                        | 40                       | 54                      | Appl. Catal. B-<br>Environ., 2021, 292,<br>120168 |
| <b>S-Mo<sub>2</sub>C/CC</b>                                            | 121                      | 64.7                    | Appl. Catal. B-<br>Environ., 2023, 322,<br>122131 |
| <b>MoO<sub>2</sub>-Mo<sub>2</sub>C-NC@CC-950 °C</b>                    | 79                       | 59.7                    | Chem. Eng. J., 2023,<br>469, 143908               |
| <b>Co<sub>2</sub>P/Mo<sub>2</sub>C/Mo<sub>3</sub>Co<sub>3</sub>C@C</b> | 182                      | 68                      | J. Mater. Chem. A,<br>2018, 6, 5789               |
| <b>Mo<sub>2</sub>C/Mo<sub>3</sub>N<sub>2</sub>/C</b>                   | 76                       | 52.6                    | J. Mater. Chem. A,<br>2023, 11, 6581              |
| <b>Mo<sub>2</sub>C NWAs/CFP</b>                                        | 170                      | 72                      | Adv. Funct. Mater.,<br>2018, 28, 1804600          |

|                                                     |     |      |                                                    |
|-----------------------------------------------------|-----|------|----------------------------------------------------|
| <b>Mo<sub>2</sub>C/C</b>                            | 164 | 66   | Small Methods, 2021,<br>5, 2100334                 |
| <b>MoC-Mo<sub>2</sub>C</b>                          | 114 | 62   | Nat. Commun., 2021,<br>12, 6776                    |
| <b>Mo<sub>2</sub>C@NCS</b>                          | 132 | 78   | Appl. Catal. B-<br>Environ., 2020, 263,<br>118352  |
| <b>Ni/Mo<sub>2</sub>C</b><br><b>(1:2)-NCNFs</b>     | 143 | 57.8 | Adv. Energy Mater.,<br>2019, 9, 1970027            |
| <b>Coral-like Mo<sub>2</sub>C</b>                   | 110 | 73.9 | Chem. Eng. J., 2023,<br>451, 138977.               |
| <b>Co/<math>\beta</math>-Mo<sub>2</sub>C@N-CNTs</b> | 170 | 92   | Angew. Chem. Int. Ed.,<br>2019, 58, 4923           |
| <b>MoP-Mo<sub>2</sub>C/NPC</b>                      | 120 | 50.3 | Chem. Eng. J., 2022,<br>431,133719                 |
| <b>H-Mo<sub>2</sub>C/NG</b>                         | 63  | 48   | Nat. Commun., 2022,<br>13, 7225                    |
| <b>Co<sub>2</sub>P/Mo<sub>2</sub>C@NC</b>           | 86  | 46   | Appl. Catal. B-<br>Environ., 2022, 310,<br>121354. |

---

**Table S1.** Summary of some recently reported Mo<sub>2</sub>C-based HER catalysts in alkaline electrolytes.



| Catalyst                              | Electrolyte                                         | $\eta_{10}$ (mV vs. RHE) | Tafel slope (mV/dec) | Ref.                                               |
|---------------------------------------|-----------------------------------------------------|--------------------------|----------------------|----------------------------------------------------|
| <b>Mo<sub>2</sub>C@C/Co@C</b>         | 1.0 M KOH<br>+ 0.2 M N <sub>2</sub> H <sub>4</sub>  | -83                      | 13.6                 | This work                                          |
| <b>CoH-CoPV@CFP</b>                   | 1.0 M KOH<br>+ 0.4 M N <sub>2</sub> H <sub>4</sub>  | -61                      | 59.9                 | Appl. Catal. B-<br>Environ., 2024,<br>345, 123661. |
| <b>CC@CoNC-600</b>                    | 1.0 M KOH<br>+ 0.5 M N <sub>2</sub> H <sub>4</sub>  | -61                      | 49                   | Small, 2023, 19,<br>2300019                        |
| <b>MoO<sub>2</sub>/Co-NF</b>          | 1.0 M KOH<br>+ 0.5 M N <sub>2</sub> H <sub>4</sub>  | -73                      | 22.9                 | J. Mater. Chem. A,<br>2022, 10, 17297              |
| <b>p-Co/CF</b>                        | 1.0 M KOH<br>+ 0.05 M N <sub>2</sub> H <sub>4</sub> | -150                     | 8.83                 | Energy Environ.<br>Sci., 2022, 15,<br>3246         |
| <b>Co<sub>3</sub>Ta/C NP</b>          | 3.0 M KOH<br>+ 0.2 M N <sub>2</sub> H <sub>4</sub>  | -86 ( $\eta_0$ )         | 56.9                 | Nat. Commun.,<br>2019, 10, 4514                    |
| <b>Ru-Co<sub>3</sub>O<sub>4</sub></b> | 1.0 M KOH<br>+ 1.0 M N <sub>2</sub> H <sub>4</sub>  | -24 ( $\eta_{100}$ )     | 44                   | Adv. Funct.<br>Mater., 2024, 34,<br>2311063        |
| <b>CoN-Co<sub>2</sub>N@NF</b>         | 1.0 M KOH<br>+ 0.1 M N <sub>2</sub> H <sub>4</sub>  | -26 ( $\eta_{100}$ )     | 42                   | Small, 2024, 20,<br>2306100                        |
| <b>NiCoP/NF</b>                       | 1.0 M KOH                                           | -83 ( $\eta_{100}$ )     | 14                   | ACS Nano, 2023,                                    |

|                                              |                                       |     |      |                 |
|----------------------------------------------|---------------------------------------|-----|------|-----------------|
|                                              | + 0.2 M N <sub>2</sub> H <sub>4</sub> |     |      | 17, 10965       |
| <b>N-Ni<sub>5</sub>P<sub>4</sub>@CoP/CFP</b> | 1.0 M KOH                             | -32 | 24.9 | Appl. Catal. B- |
|                                              | + 0.1 M N <sub>2</sub> H <sub>4</sub> |     |      | Environ., 2023, |
|                                              |                                       |     |      | 324, 122207.    |
| <b>PW-Co<sub>3</sub>N NWA/NF</b>             | 1.0 M KOH                             | -55 | 14   | Nat. Commun.,   |
|                                              | + 0.1 M N <sub>2</sub> H <sub>4</sub> |     |      | 2020, 11, 1853  |

---

**Table S2.** Summary of some reported Co-based HzOR catalysts.
